# Supplementary material for: All-You-Can-Eat: Influence of Proximity to Maize Gardens on the Wild Diet and the Forest Activities of the Sebitoli Chimpanzee Community in Kibale National Park
Source: MDPI journal article supplement (doi:10.3390/ani12070806), 2022-03-22
Supplement: s1 [file s1]

# All-You-Can-Eat: Influence of Maize Gardens' Proximity on the Wild Diet and the Forest Activities of the Sebitoli Chimpanzee Community in Kibale National Park

Chloé Couturier\*, Sarah Bortolamiol, Sylvia Ortmann, John-Paul Okimat, Edward Asalu and Sabrina Krief

\* Correspondence: [chloe.couturier@mnhn.fr](mailto:chloe.couturier@mnhn.fr)

## Supplementary Materials:

Table S1: List of chimpanzees monitored by the FNN protocol between January 2016 and January 2019 in Kibale National Park, Uganda.

Table S2: Repartition of FNN among sex-age classes, maize seasons and wild fruit availability between January 2016 and January 2019 in Kibale National Park, Uganda.

Table S3: Detailed statistics between sex-age classes in activity budget, daily paths, energy expenditures, frugivory, energy intakes and energy balance.

Text S1: Nutritional analysis protocol.

Table S4: List of wild fruits consumed by the Sebitoli community between January 2016 and January 2019 in Kibale National Park, Uganda.

Table S5: Dry mass (g) of 13 fruits from Sebitoli and Kanyawara in Kibale National Park, Uganda.

## References:

54. N'guessan, A.K.; Ortmann, S.; Boesch, C. Daily Energy Balance and Protein Gain Among *Pan troglodytes verus* in the Taï National Park, Côte d'Ivoire. *Int. J. Primatol.* **2009**, *30*, 481–496. <https://doi.org/10.1007/s10764-009-9354-1>.
94. Houle, A.; Wrangham, R.W. Contest Competition for Fruit and Space among Wild Chimpanzees in Relation to the Vertical Stratification of Metabolizable Energy. *Animal Behaviour*. **2021**, *175*, 231–246. <https://doi.org/10.1016/j.anbehav.2021.03.003>.
103. Houle, A.; Conklin-Brittain, N.L.; Wrangham, R.W. Vertical Stratification of the Nutritional Value of Fruit: Macronutrients and Condensed Tannins: Intratree Variations in Macronutrients. *Am. J. Primatol.* **2014**, *76*, 1207–1232. <https://doi.org/10.1002/ajp.22305>.
131. Van Soest, P.J. *Nutritional Ecology of the Ruminant*; Cornell University Press: Ithaca, NY, USA, 2018.

**Table S1.** List of chimpanzees monitored by the FNN protocol between January 2016 and January 2019 in Kibale National Park, Uganda. .

| Code ID | Sex | Estimated Date of Birth | Class <sup>a</sup> | Mother Status                                           | Total Time of Observation | No. of focal <sup>b</sup> | No. of Focals (80%) <sup>c</sup> |
|---------|-----|-------------------------|--------------------|---------------------------------------------------------|---------------------------|---------------------------|----------------------------------|
| ET      | M   | 1983                    | AM                 |                                                         | 309:23                    | 35                        | 19                               |
| BM      | M   | 1997                    | AM                 |                                                         | 251:07                    | 32                        | 17                               |
| AG      | M   | 1997                    | AM                 |                                                         | 226:07                    | 27                        | 11                               |
| UL      | M   | 2001                    | AM                 |                                                         | 156:15                    | 19                        | 7                                |
| KT      | F   | 1975                    | MO                 | Gestant until 2016/8 then lactant                       | 135:54                    | 17                        | 11                               |
| NE      | M   | 1965                    | AM                 |                                                         | 120:33                    | 16                        | 12                               |
| LA      | M   | 2000                    | AM                 |                                                         | 91:41                     | 11                        | 6                                |
| KE      | F   | 1987                    | MO                 | Lactant until 2017/4 gestant until 2017/11 then lactant | 81:07                     | 10                        | 6                                |
| KI      | M   | 2005                    | YO                 |                                                         | 61:00                     | 7                         | 3                                |
| MU      | M   | 1994                    | AM                 |                                                         | 44:44                     | 5                         | 3                                |
| KB      | M   | 2005                    | YO                 |                                                         | 40:31                     | 5                         | 3                                |
| GB      | F   | 1990                    | MO                 | Gestant until 2016/8 then lactant                       | 37:41                     | 5                         | 2                                |
| DT      | F   | 2000                    | AF                 |                                                         | 28:40                     | 4                         | 4                                |
| PP      | F   | 1980                    | AF                 |                                                         | 27:39                     | 4                         | 1                                |
| MJ      | F   | 1990                    | MO                 | Lactant until 2019                                      | 17:25                     | 2                         | 1                                |
| LK      | M   | 2006                    | YO                 |                                                         | 16:29                     | 2                         | 2                                |
| HU      | M   | 1993                    | AM                 |                                                         | 15:22                     | 2                         | 2                                |
| BR      | F   | 1990                    | MO                 | Lactant until 2018                                      | 10:23                     | 1                         | 0                                |
| GL      | F   | 1975                    | AF                 |                                                         | 8:01                      | 1                         | 1                                |
| NK      | F   | 1985                    | MO                 | Lactant until 2018/5 then pregnant                      | 6:42                      | 1                         | 1                                |
| Total   |     |                         |                    |                                                         | 1686:44                   | 206                       | 112                              |

<sup>a</sup> No individual changed during the study period; <sup>b</sup> FNN with a duration superior or equal to 6 hours; <sup>c</sup> Only FNN with at least 6 hours duration and 80% of the total feeding time covered by the 11 fruits used in nutritional analysis; AF: non-maternal adult females; MO: mothers; AM: adult males; YO: subadult males. Time of observation is expressed in hours and minutes.

**Table S2.** Repartition of FNN among sex-age classes, maize seasons and wild fruit availability between January 2016 and January 2019 in Kibale National Park, Uganda.

|      |         |    | No maize | Maize | HFA | LFA |
|------|---------|----|----------|-------|-----|-----|
| All  | Females | AF | 6        | 3     | 2   | 7   |
|      |         | MO | 17       | 19    | 14  | 20  |
|      | Males   | AM | 82       | 65    | 61  | 75  |
|      |         | YO | 9        | 5     | 2   | 12  |
|      | Total   |    | 114      | 92    | 79  | 114 |
| 80%* | Females | AF | 2        | 4     | 1   | 5   |
|      |         | MO | 10       | 11    | 7   | 13  |
|      | Males   | AM | 37       | 40    | 34  | 38  |
|      |         | YO | 4        | 4     | 2   | 6   |
|      | Total   |    | 53       | 59    | 44  | 62  |

\* Only FNN with at least 80% of the total feeding time covered by the 11 fruits used in nutritional analysis; AF: non-mother adult females; MO: mothers; AM: adult males; YO: subadult males; HFA: high fruit availability; LFA: low fruit availability for wild fruits.

**Table S3.** Detailed statistics between sex-age classes in activity budget, daily paths, energy expenditures, frugivory, energy intakes and energy balance.

| Variables       | Sex-Age classes                               |                                                                                                                                                                         |
|-----------------|-----------------------------------------------|-------------------------------------------------------------------------------------------------------------------------------------------------------------------------|
|                 | Kruskal–Wallis                                | Dunn and Bonferroni Cor.                                                                                                                                                |
| Activity Budget |                                               |                                                                                                                                                                         |
| % Rest          | H(3) = 11.6<br><b><i>p</i> &lt; 0.01*</b>     | AM vs. MO: <i>p</i> < 0.01*                                                                                                                                             |
| % Travel        | H(3) = 15.3<br><b><i>p</i> &lt; 0.005**</b>   | AM vs. MO: <i>p</i> < 0.005**<br>YO vs. MO: <i>p</i> < 0.05*                                                                                                            |
| % Feed          | H(3) = 3.9<br><i>p</i> = 0.272                | -                                                                                                                                                                       |
| DLT             | H(3) = 25.4<br><b><i>p</i> &lt; 0.0001***</b> | MO vs. AM: <i>p</i> < 0.01*                                                                                                                                             |
| TDEE            | H(3) = 79.2<br><b><i>p</i> &lt; 0.0001***</b> | MO vs. AM: <i>p</i> < 0.0001***<br>MO vs. YO: <i>p</i> < 0.0001***<br>MO vs. AF: <i>p</i> < 0.0001***<br>AF vs. AM: <i>p</i> < 0.0005***<br>AF vs. YO: <i>p</i> < 0.05* |
| % Frugivory     | H(3) = 0.22<br><i>p</i> = 0.974               | -                                                                                                                                                                       |
| Ingestion rate  | H(3) = 1.8<br><i>p</i> = 0.614                | -                                                                                                                                                                       |
| Energy balance  | H(3) = 1.28<br><i>p</i> = 0.734               | -                                                                                                                                                                       |

DLT: daily length travel, TDEE: total daily energy expenditures; AF: Non-suited adult females; AM: adult male; MO: mothers; YO: subadult males. Bold *p*-values are significant (\* < 0.05 \*\* < 0.005, \*\*\* < 0.0005).

**Text S1.** Nutritional analysis protocol

Diet quality was analyzed as previously described in N'Guessan et al. [54]. Briefly, we determined in duplicate: gross energy (kJ/g); dry matter DM (%); macronutrients (%DM) and minerals (mg/kgDM).

For nutrient content analyses, we used the following standard methods: Dry matter was determined by drying a subsample at 105 °C until constant weight. Gross energy was determined via bomb calorimetry (IKA-Calorimeter C4000, Ika, Stauffen, Germany) and crude fat via ethyl ether extraction (Soxhlett method; AOAC no. 963.15). For crude protein analysis (CP, AOAC no. 977.02), a subsample was burned at high temperature (about 950 °C) in pure oxygen (Dumas combustion). This provides the nitrogen content of the sample, and crude protein was calculated according to  $CP = N \times 6.25$ . Starch, sucrose, glucose, and fructose were determined with the help of enzymatic tests and crude ash by burning the dried sample in a muffle furnace for at least two hours at 550 °C (AOAC no. 942.05), after which only inorganic matter remained; the amount of ash was then obtained by the difference in weights. The detergent system of fiber analysis after van Soest [131] was used to estimate the amount of indigestible carbohydrates in samples. This method consists of dissolving successively soluble cell components, hemicelluloses, and celluloses. We obtained sequentially neutral detergent fiber (NDF, AOAC no. 2002.04), acid detergent fiber (ADF), and acid detergent lignin (ADL, AOAC no. 973.18). For mineral analysis (Ca; Cu; Fe; Zn; Mg; Mn; Na, K, P, S, and Zn), samples were microwave digested and analyzed by inductively coupled plasma optical emission spectrometer (model Optima 8000, Perkin Elmer).

**Table S4.** List of wild fruits consumed by the Sebitoli community between January 2016 and January 2019 in Kibale National Park, Uganda.

| Species                                                                | Part Eaten | Feeding Time (h) | % (fruits) | % (total diet) |
|------------------------------------------------------------------------|------------|------------------|------------|----------------|
| <i>Ficus sur</i> ( <i>F. capensis</i> )                                | URF, RF    | 60.46            | 18.3       | 15.0           |
| <i>Ficus dawei</i> ( <i>F. saussureana</i> )                           | RF         | 59.80            | 18.1       | 14.8           |
| <i>Ficus exasperata</i>                                                | URF, RF    | 43.08            | 13.0       | 10.7           |
| <i>Ficus natalensis</i>                                                | URF, RF    | 34.63            | 10.5       | 8.6            |
| <i>Cordia abyssinica</i> ( <i>C. africana</i> )                        | RF         | 29.19            | 8.8        | 7.2            |
| <i>Mimusops bagshawei</i> ( <i>M. ugandensis</i> )                     | URF, RF    | 22.20            | 6.7        | 5.5            |
| <i>Drypetes</i> sp. ( <i>D. gerrardii</i> or <i>D. battiscombei</i> )* | RF         | 20.76            | 6.3        | 5.1            |
| <i>Ficus brachylepis</i> ( <i>F. sansibarica</i> )                     | RF         | 13.72            | 4.1        | 3.4            |
| <i>Aphania senegalensis</i> ( <i>Lepisanthus senegalensis</i> )        | RF         | 9.74             | 2.9        | 2.4            |
| <i>Ficus mucoso</i>                                                    | RF         | 8.72             | 2.6        | 2.2            |
| <i>Ficus cyathistipula</i> ( <i>F. callenscens</i> )                   | RF         | 5.15             | 1.6        | 1.3            |
| <i>Cordia ugandensis</i> ( <i>C. millenii</i> )                        | RF         | 4.66             | 1.4        | 1.2            |
| <i>Phytolacca</i> sp.                                                  | RF         | 3.64             | 1.1        | 0.9            |
| <i>Bosqueia phoberos</i> ( <i>Trilepisium madagascariense</i> )        | RF         | 3.15             | 1.0        | 0.8            |
| <i>Aframomum</i> sp.                                                   | URF, RF    | 2.59             | 0.8        | 0.6            |
| <i>Triclisia</i> sp.                                                   | URF, RF    | 1.49             | 0.5        | 0.4            |
| <i>Carapa</i> sp.                                                      | RF         | 1.01             | 0.3        | 0.3            |
| <i>Ficus thoningii</i>                                                 | RF         | 1.01             | 0.3        | 0.3            |
| <i>Euadenia eminens</i>                                                | RF         | 0.71             | 0.2        | 0.2            |
| <i>Ficus vallis</i>                                                    | RF         | 0.67             | 0.2        | 0.2            |
| <i>Urera hyspiloides</i>                                               | RF         | 0.66             | 0.2        | 0.2            |
| <i>Conopharyngia</i> sp.                                               | URF, RF    | 0.65             | 0.2        | 0.2            |
| <i>Tylostemon ugandensis</i>                                           | RF         | 0.52             | 0.2        | 0.1            |
| Unspecified                                                            | RF         | 0.50             | 0.2        | 0.1            |
| <i>Dovyalis macrocalyx</i>                                             | RF         | 0.48             | 0.1        | 0.1            |
| <i>Pseudospondias microcarpa</i>                                       | RF         | 0.41             | 0.1        | 0.1            |
| <i>Pancovia turbinata</i>                                              | RF         | 0.38             | 0.1        | <0.1           |
| <i>Ehretia cymosa</i>                                                  | RF         | 0.19             | <0.1       | <0.1           |
| <i>Monodora</i> sp.                                                    | RF         | 0.18             | <0.1       | <0.1           |
| <i>Ficus stipulifera</i>                                               | RF         | 0.12             | <0.1       | <0.1           |
| <i>Parinari holstii</i>                                                | RF         | 0.10             | <0.1       | <0.1           |
| <i>Hoslundia opposita</i>                                              | RF         | 0.01             | <0.1       | <0.1           |
| <i>Ficus urceolaris</i>                                                | RF         | 0.01             | <0.1       | <0.1           |

\* Subspecies of *Drypetes* sp. among the two present in the study area were not specified by the observers. Otherwise, synonym species are specified in brackets. Species in bold were collected in 2015 for nutritional analysis and integrated with energy calculations for this study. URF: unripe fruit, RF: ripe fruit.

**Table S5.** Dry mass (g) of 13 fruits from Sebitoli and Kanyawara in Kibale National Park, Uganda.

| Species                     | Part | SBL <sup>1</sup> |              | KWRA. <sup>3</sup> | KWRA. <sup>4</sup> |
|-----------------------------|------|------------------|--------------|--------------------|--------------------|
|                             |      | N                | X (SD)       |                    |                    |
| <i>Aphania senegalensis</i> | RF   | 250              | 0.89 (0.58)  | -                  | -                  |
| <i>Cordia abyssinica</i>    | RF   | 200              | 0.28 (0.24)  | 0.22               | 0.38               |
| <i>Ficus sansibarica</i>    | RF   | 40               | 7.14 (18.16) | 2.66               | 2.66               |
| <i>Ficus sausureana</i>     | RF   | 336              | 1.70 (3.53)  | -                  | -                  |
| <i>Ficus exasperata</i>     | RF   | 100              | 0.22 (0.67)  | -                  | 0.26               |
|                             | URF  | 50               | 0.42 (0.35)  | -                  | 0.17               |
| <i>Ficus mucoso</i>         | RF   | 71               | 5.88 (0.65)  | -                  | -                  |
| <i>Ficus natalensis</i>     | RF   | 350              | 0.41 (0.68)  | 0.31               | 0.32               |
|                             | URF  | -                | -            | -                  | -                  |
| <i>Ficus sur</i>            | RF   | 1965             | 0.95 (3.79)  | 0.72               | 0.72               |
|                             | URF  | 300              | 0.71 (1.75)  | 0.55               | 0.55               |
| <i>Mimusops bagshawei</i>   | RF   | -                | -            | 1.18               | 1.19               |
|                             | URF  | 100              | 0.72 (0.65)  | 0.97               | 0.80               |

N: number of fruits, X: mean dry weight per fruit (g), SD: standard deviation. Values for the different sites are from: <sup>1</sup>this study; <sup>2</sup>[94]; <sup>3</sup>[103]; SBL: Sebitoli, KWRA: Kanyawara.
